# Supplementary material
Source: Springer Nature journal article supplement (https://www.springermedizin.de/resource/supplementary/12885_2009_1998_MOESM2_ESM.pdf/9460274)

# Overall survival

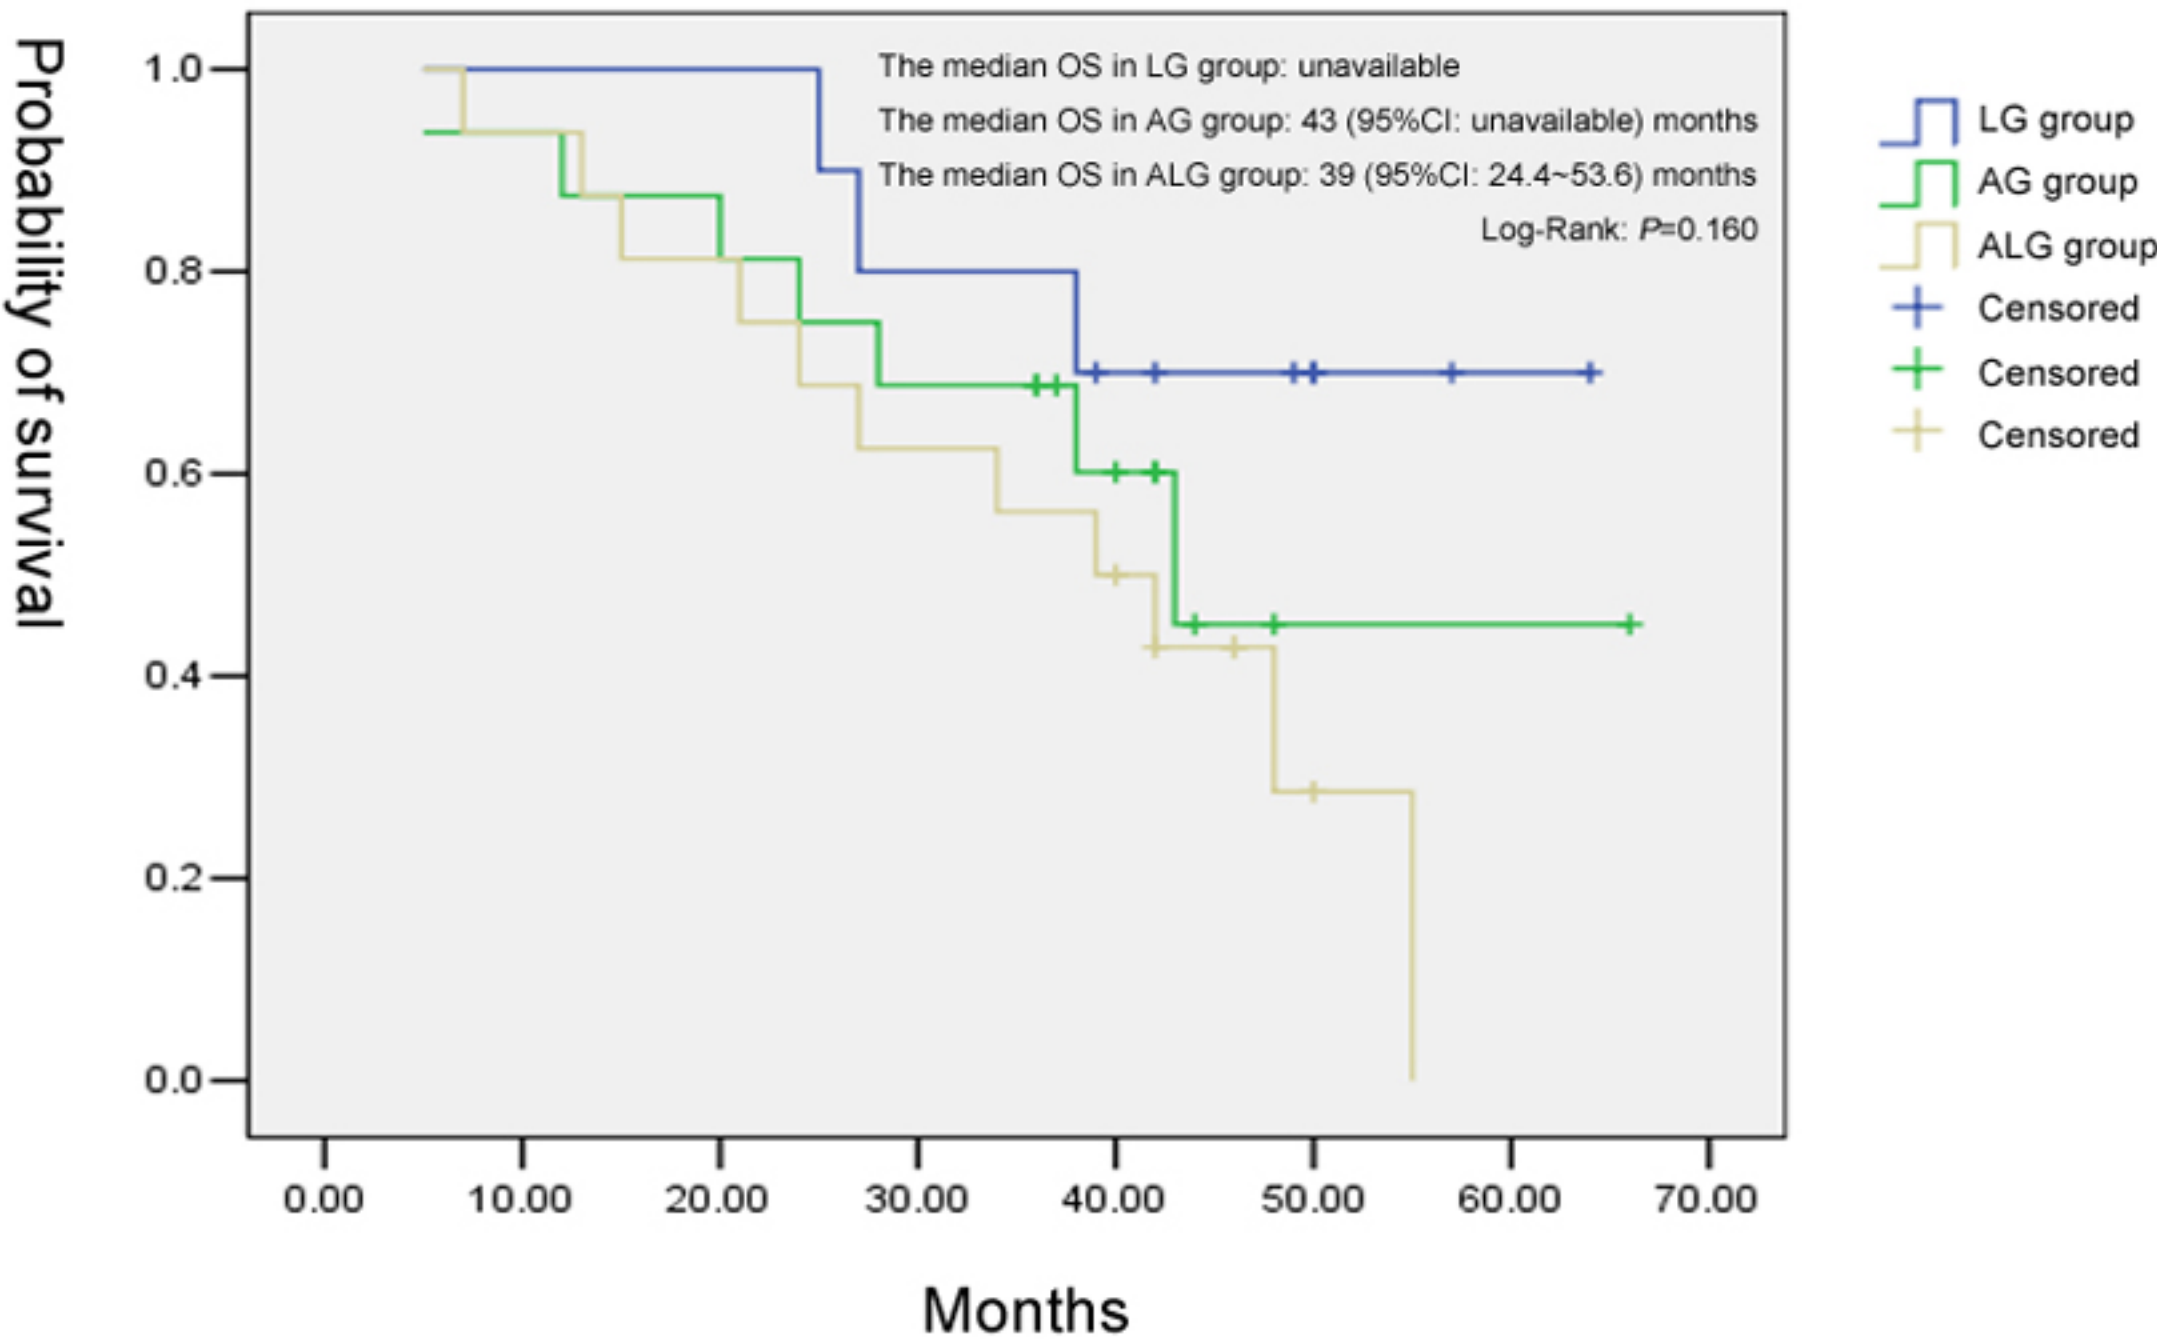

Supplement: MOESM2 [file 9460274]
